# Supplementary material
Source: Research Square preprint supplement (doi:10.21203/rs.3.rs-10332157/v1)

## Graphical abstract


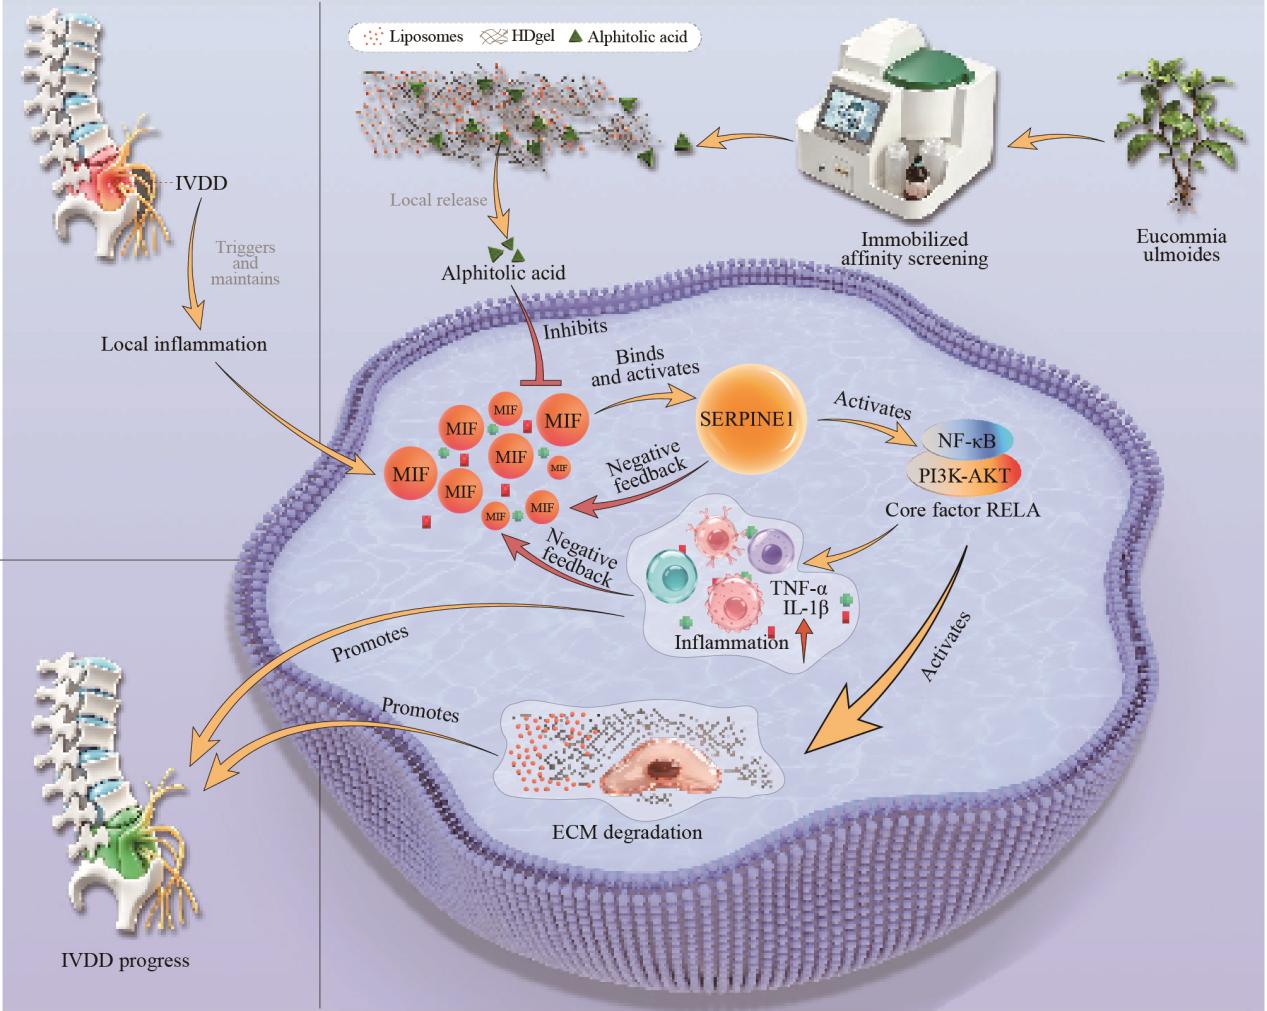

Supplement: Supplementary file 2 [file b96f96ab7dc73e3290eb7e12.docx]
